# Supplementary material for: A deep tetranuclear metallo-cavitand with bis(aryl) palladium bridges
Source: Royal Society of Chemistry journal article supplement (doi:10.1039/c0cc00534g), 2010-01-01
Supplement: c0cc00534g.pdf [file c0cc00534g.pdf]

## Supporting Information

# A Deep Tetranuclear Metallo-Cavitand with Bis(Aryl) Palladium Bridges

Enrique Botana, M.Caterina Lubinu, Eric da Silva, Pablo Espinet and Javier de  
Mendoza\*

**Materials and Methods.**  $^1\text{H}$ ,  $^{13}\text{C}$  and  $^{19}\text{F}$  NMR spectra were carried out in deuterated solvents on Bruker Avance 400 and 500 Ultrashield spectrometers. Thermogravimetric analysis (TGA) was measured on a Mettler-Toledo TGA/SDTA 851<sup>e</sup> thermobalance. 5,11,17,23-Tetrakis(1*H*-imidazo[4,5-*f*][3,8]phenanthroline-2-yl)-25,26,27,28-tetra-octyloxycalix[4]arene **1** <sup>[1]</sup> and reagent (COD)Pd(C<sub>6</sub>F<sub>3</sub>Cl<sub>2</sub>)<sub>2</sub> <sup>[2]</sup> were synthesized according to published methods.

### Synthesis:

5,11,17,23-Tetrakis(1*H*-imidazo[4,5-*f*][3,8]phenanthroline-2-yl)-25,26,27,28-tetra-octyloxycalix[4]arene **1** (90 mg, 0.0515 mmol) and (COD)Pd(C<sub>6</sub>F<sub>3</sub>Cl<sub>2</sub>)<sub>2</sub> (127 mg, 0.2060 mmol) were suspended in THF (HPLC grade, 17 ml) and the mixture was stirred at room temperature for 48 hours. The solvent was evaporated; the residue was dissolved in THF (2 ml) and ethyl ether was added (40 ml). A fine solid precipitated. It was kept at -18 °C for further precipitation overnight. The precipitate was filtered, washed with ethyl ether and dried giving **3** as a yellow powder (0.1659 g, 86%).

$^1\text{H}$  NMR (500 MHz, THF-*d*<sub>8</sub>)  $\delta$  = 14.47 (s, 4H; NH), 10.90 (s, 8H; H<sub>a</sub>), 9.45 (d, 8H, *J* = 6.3 Hz; H<sub>b</sub>), 8.84-8.54 (m, 8H; H<sub>d</sub>), 8.49 (d, 8H, *J* = 6.3 Hz; H<sub>c</sub>), 4.93 (d, *J* = 12.5 Hz, 4H; H<sub>ax</sub>), 4.25 (t, *J* = 7.3 Hz, 8H; OCH<sub>2</sub>), 3.81 (d, *J* = 12.5 Hz, 4H; H<sub>eq</sub>), 2.37 (m, 8H; CH<sub>2</sub>), 1.7-1.35 (m, 40H; CH<sub>2</sub>), 1.01 (t, *J* = 7.4 Hz, 12H; CH<sub>3</sub>);  $^{13}\text{C}$  NMR (DEPTQ-135, 100 MHz, THF-*d*<sub>8</sub>):  $\delta$  = 158.7, 158.4, 156.4, 156.1, 150.9, 150.5, 148.4, 144.9, 143.3, 134.8, 129.1, 121.8, 118.2, 111.0, 101.9, 74.6, 30.3, 29.0, 28.3, 28.1, 27.9, 24.3, 21.0, 11.7;  $^{19}\text{F}$  NMR (376 MHz, THF-*d*<sub>8</sub>, 220K, -53°C)  $\delta$  = -89.99 (s, F<sup>ortho</sup><sub>1</sub>), -90.53 (s, F<sup>ortho</sup><sub>2</sub>), -91.02 (s, F<sup>ortho</sup><sub>3</sub>), -91.63 (s, F<sup>ortho</sup><sub>4</sub>), -120.65 (s, F<sup>para</sup>); Anal. Calcd for C<sub>160</sub>H<sub>112</sub>Cl<sub>16</sub>F<sub>24</sub>N<sub>16</sub>O<sub>4</sub>Pd<sub>4</sub>: C 50.95, H 2.99, N 5.94. Found: C 50.62, H 3.34, N 5.63.

## NMR DATA

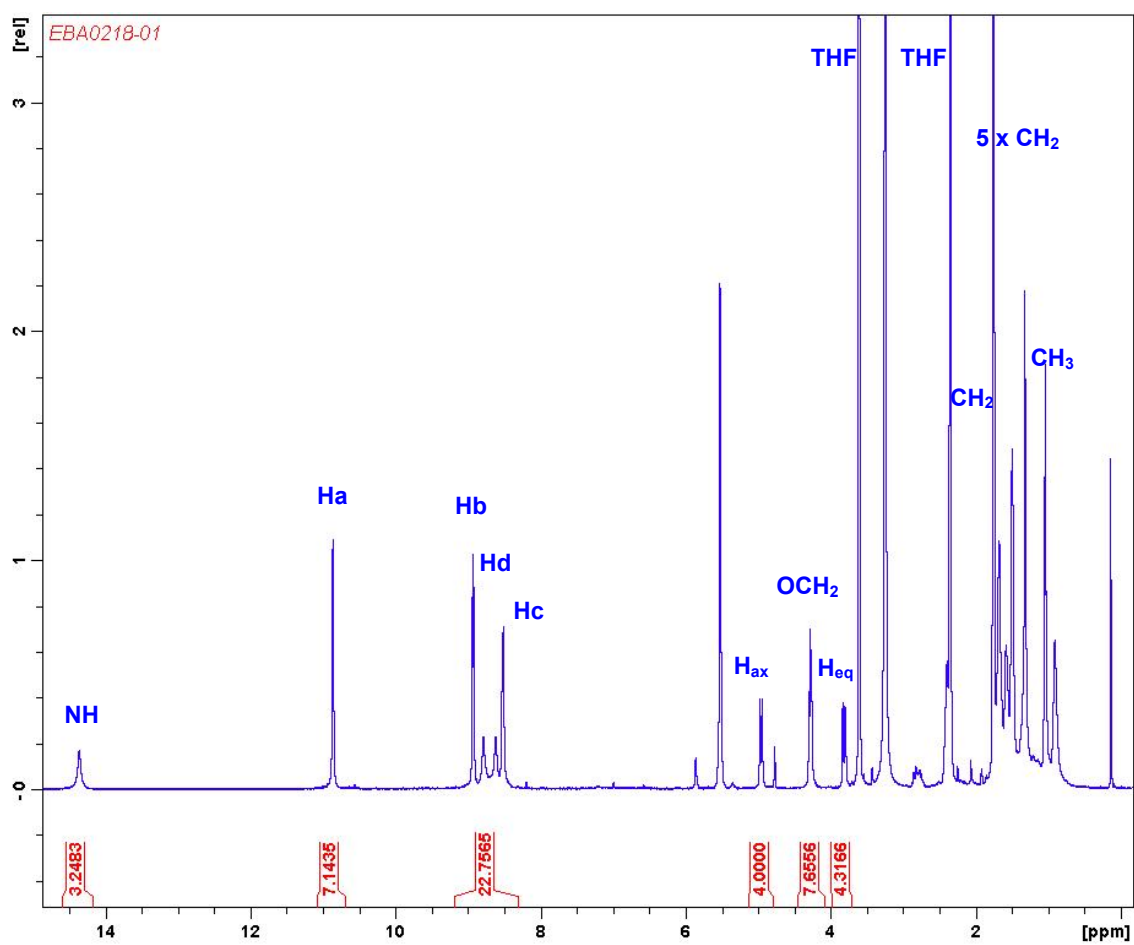

Figure S1. <sup>1</sup>H NMR (400 MHz) spectrum of **3** in THF-*d*<sub>8</sub> at room temperature

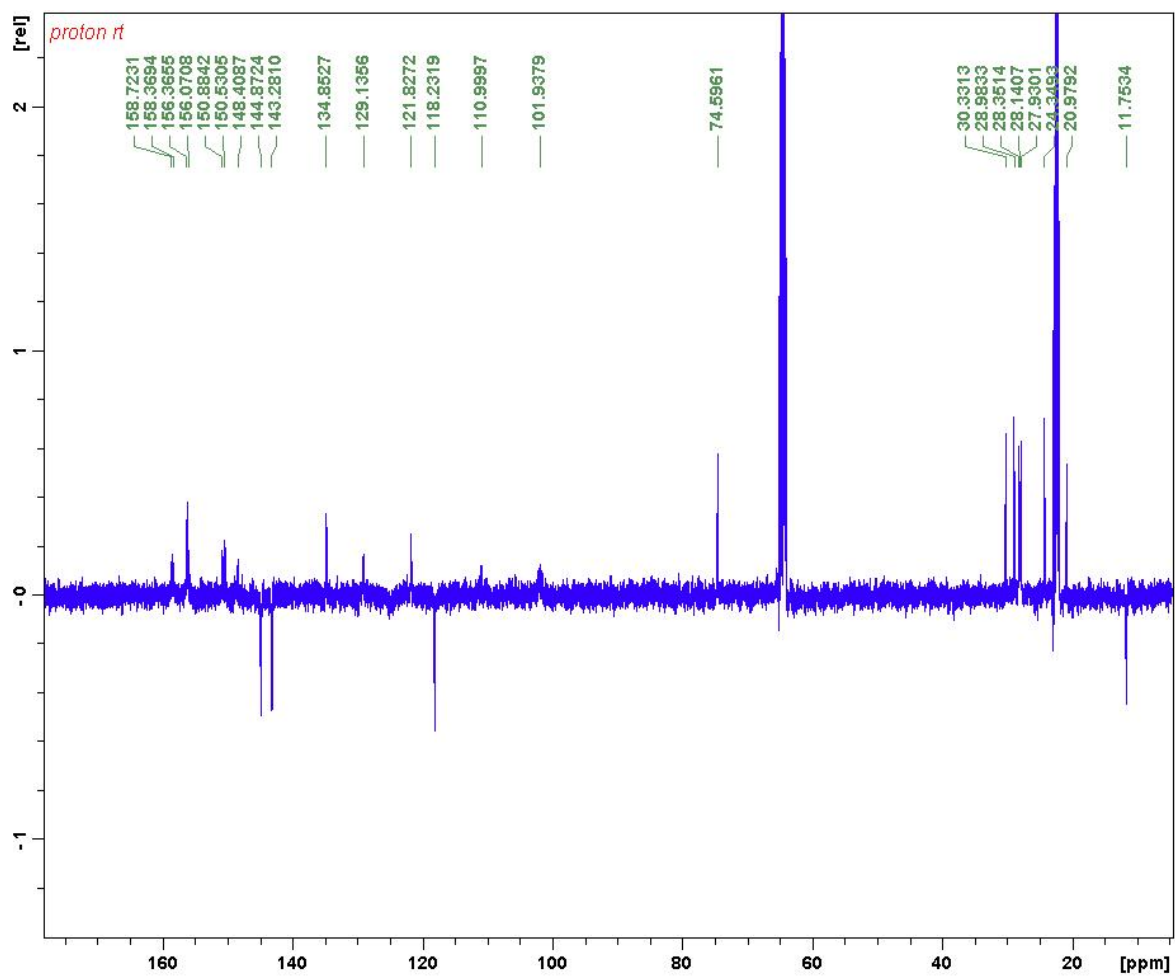

**Figure S2.**  $^{13}\text{C}$  NMR-DEPTQ-135 (100 MHz) spectrum of **3** in THF- $d_8$  at room temperature

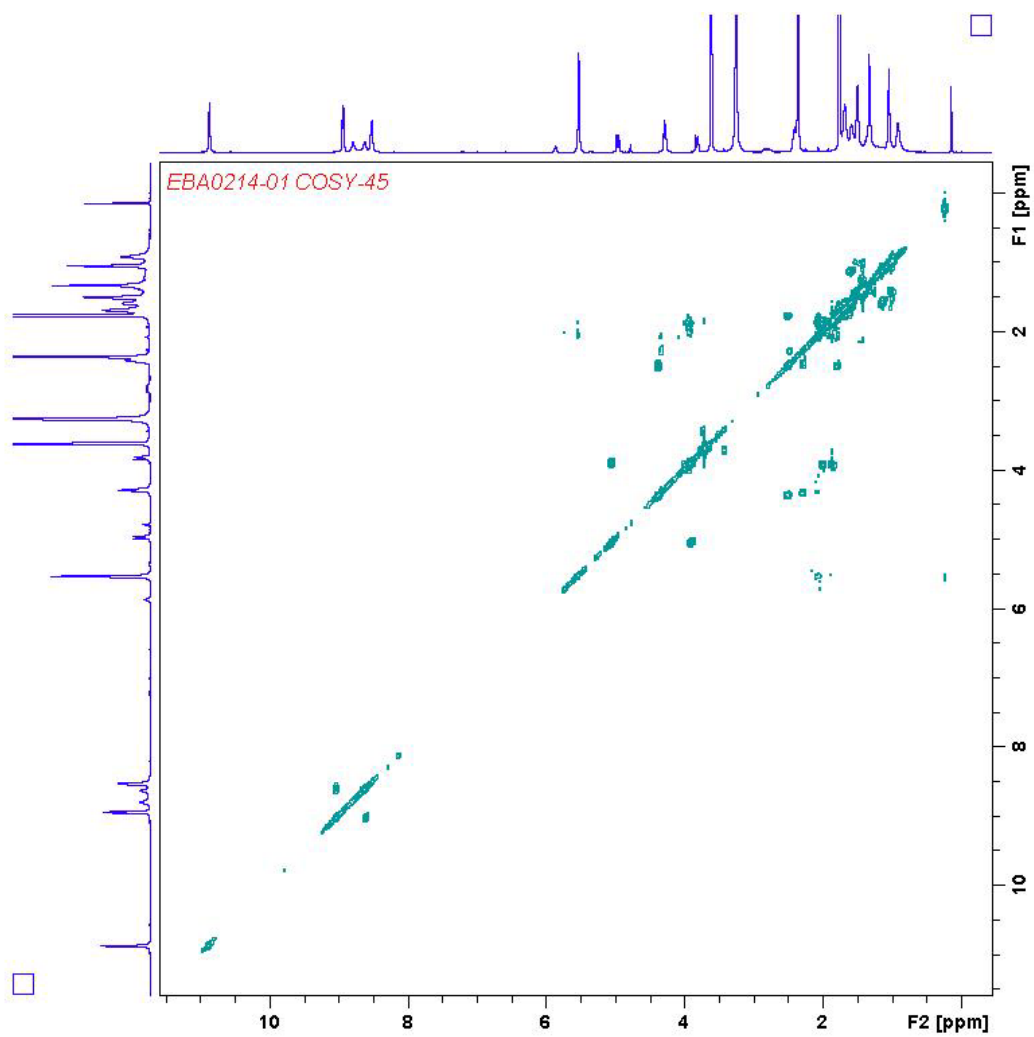

**Figure S3.**  $^1\text{H}, ^1\text{H}$ -2D COSY spectrum of **3** (400 MHz,  $\text{THF-d}_8$ , r.t.)

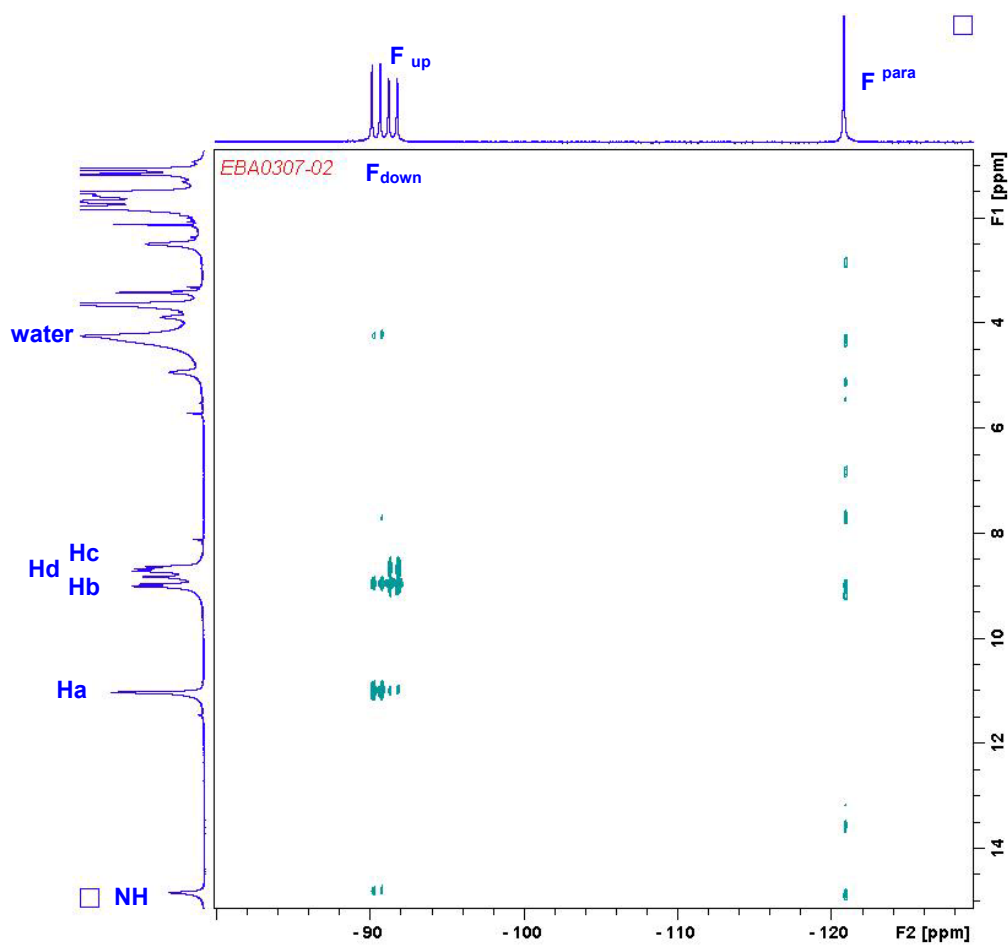

**Figure S4.**  $^1\text{H}$ ,  $^{19}\text{F}$ -2D HOESY spectrum of **3** (500 MHz,  $\text{THF-}d_8$ , at  $-53\text{ }^\circ\text{C}$ ).  
The four *ortho* fluorine atoms can be assigned as two pointing upwards ( $F_{\text{up}}$ )  
and two pointing downwards the cavity ( $F_{\text{down}}$ )

## Thermogravimetric Analysis

TGA conditions: air flow (80 ml/min), heating rate 5 °C/min until 250 °C and 30 °C in the range 250-1100 °C, sample 2.124 mg.

The highest weight loss is observed in the temperature range 250-690 °C where the Pd complex decomposes. Between 690 and 780 °C, a little mass gain is observed, as it has previously been found for other Pd complexes.<sup>[3]</sup> Decomposition of PdO<sup>[4]</sup> to Pd metal occurs around 790 °C with a final residue of 12.00%, in good accordance with the chemical formula C<sub>160</sub>H<sub>112</sub>Cl<sub>16</sub>F<sub>24</sub>N<sub>16</sub>O<sub>4</sub>Pd<sub>4</sub>.

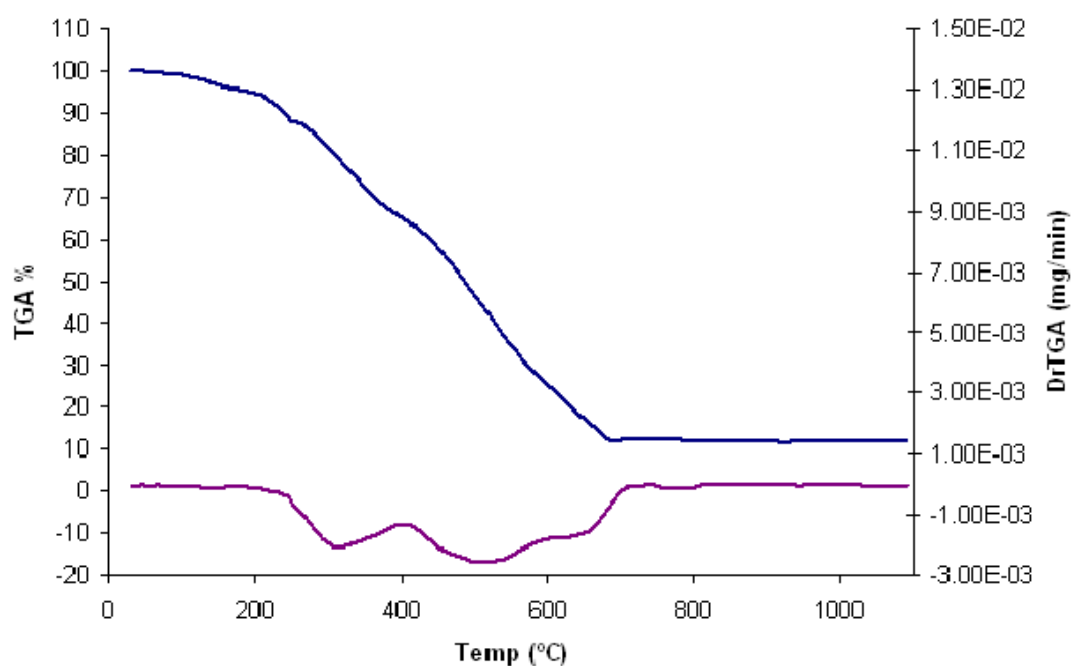

Figure S5. Thermogravimetric curve of 3

## Inclusion Complex

The complex was prepared by mixing equimolar amounts of host **3** and guest **5** in deuterated THF.

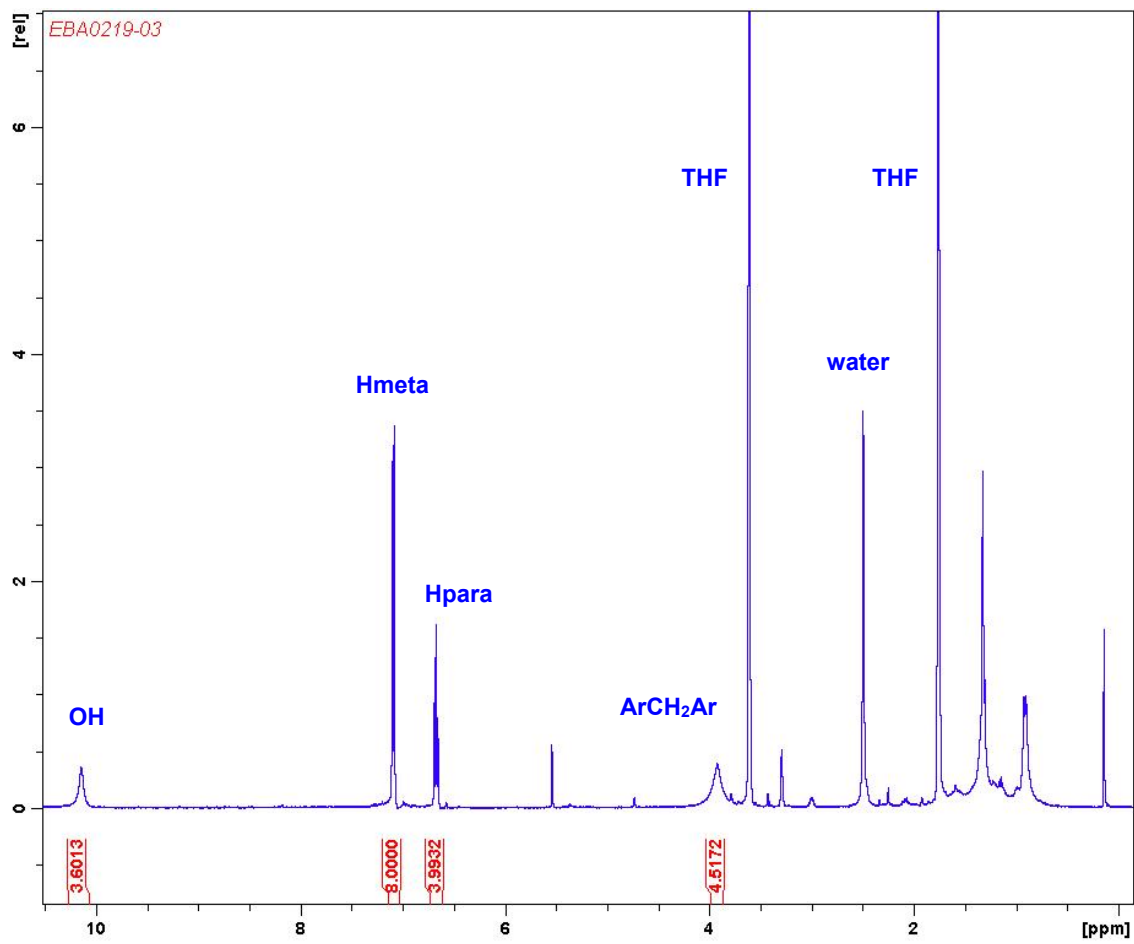

**Figure S6.** <sup>1</sup>H NMR (400 MHz, THF-*d*<sub>8</sub>) spectrum of guest **5** at room temperature

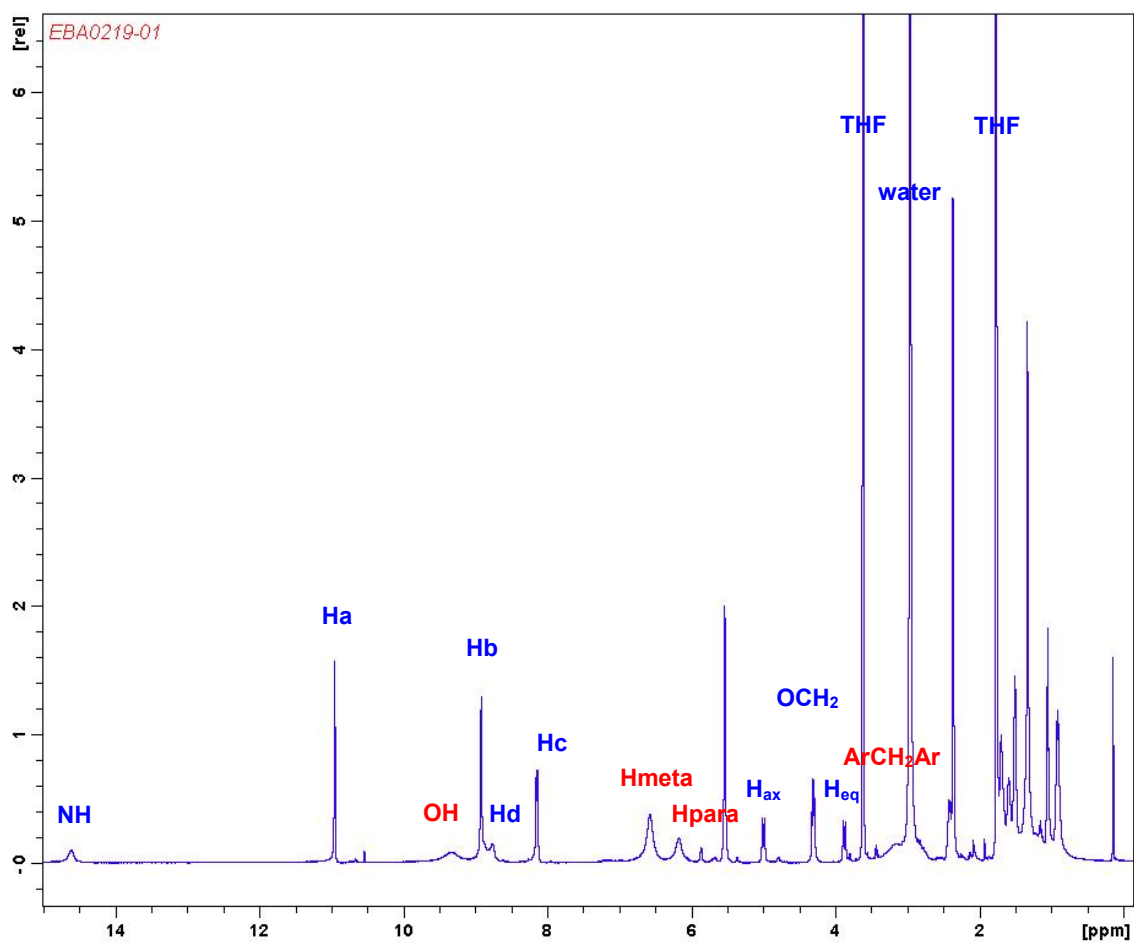

**Figure S7.**  $^1\text{H}$  NMR (400 MHz,  $\text{THF-}d_8$ , r.t.) spectrum of a 1:1 mixture of compounds **3** (blue) and **5** (red)



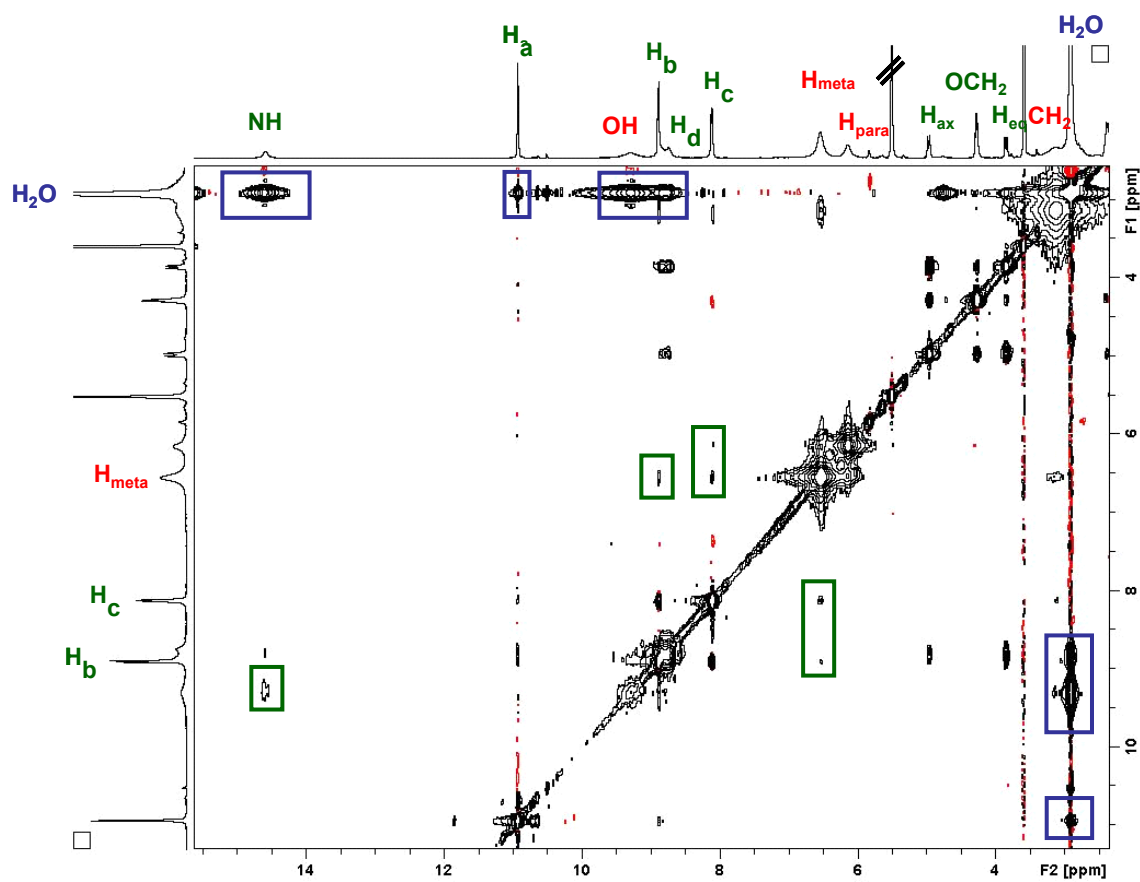

**Figure S8. Top:**  $^1\text{H}, ^1\text{H}$ -2D NOESY (400 MHz, 0.3 ms mixing time, r.t.) spectrum of **3** in  $\text{THF-}d_8$ .  
**Bottom:** intermolecular contacts scheme.

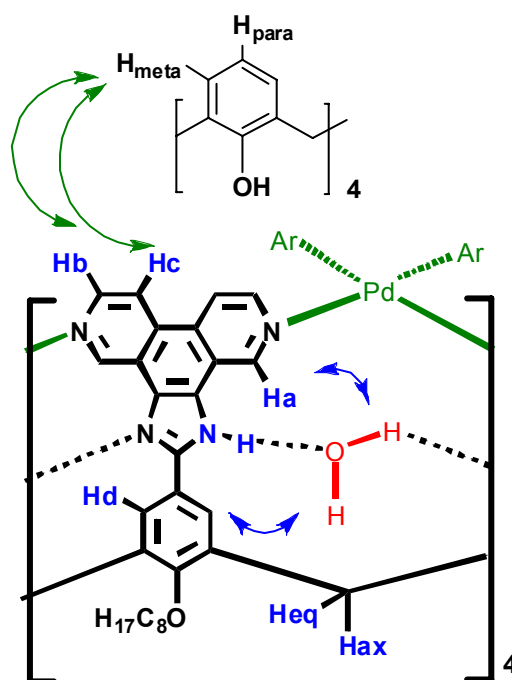

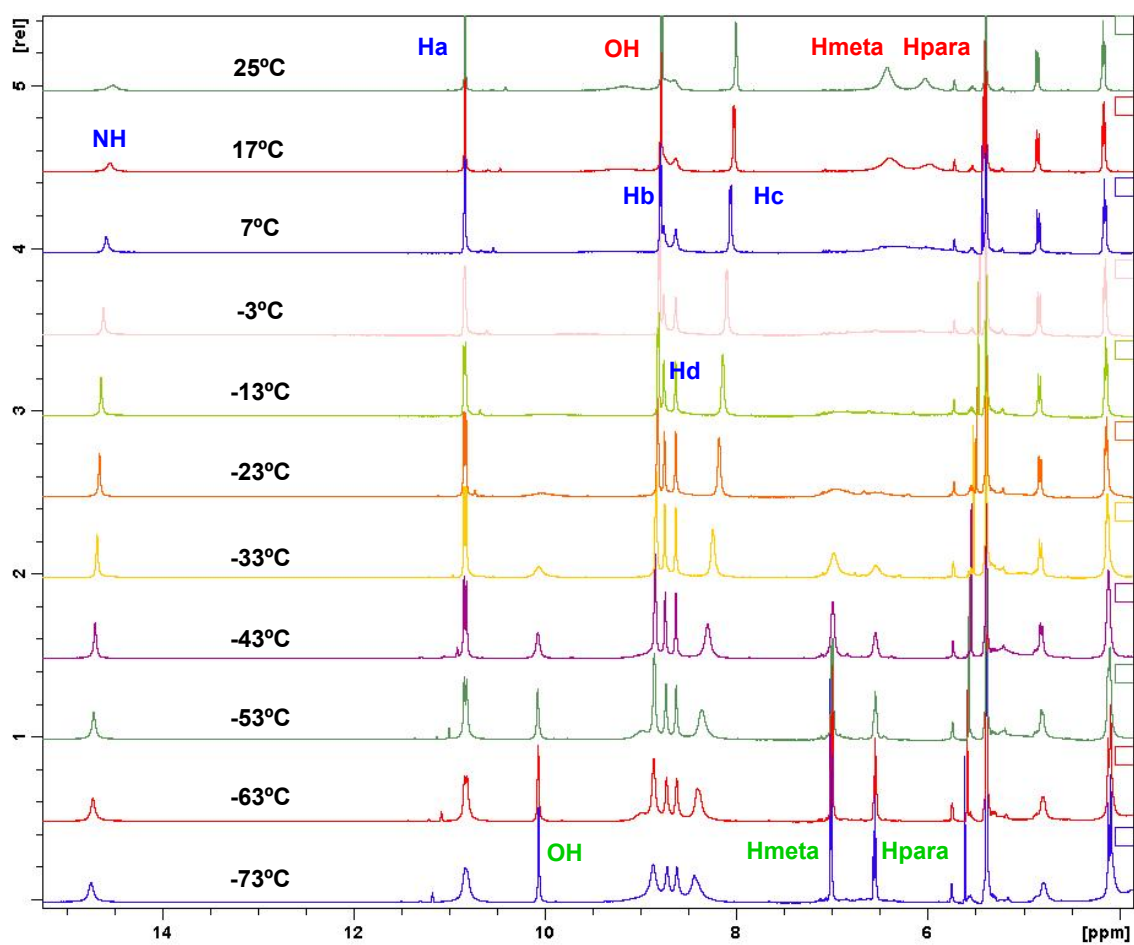

**Figure S9.** Variable Temperature <sup>1</sup>H-NMR of the 5@3 inclusion complex in THF-*d*<sub>8</sub> (1.9 mM).  
Host signals in blue, guest signals in red, free guest in green.

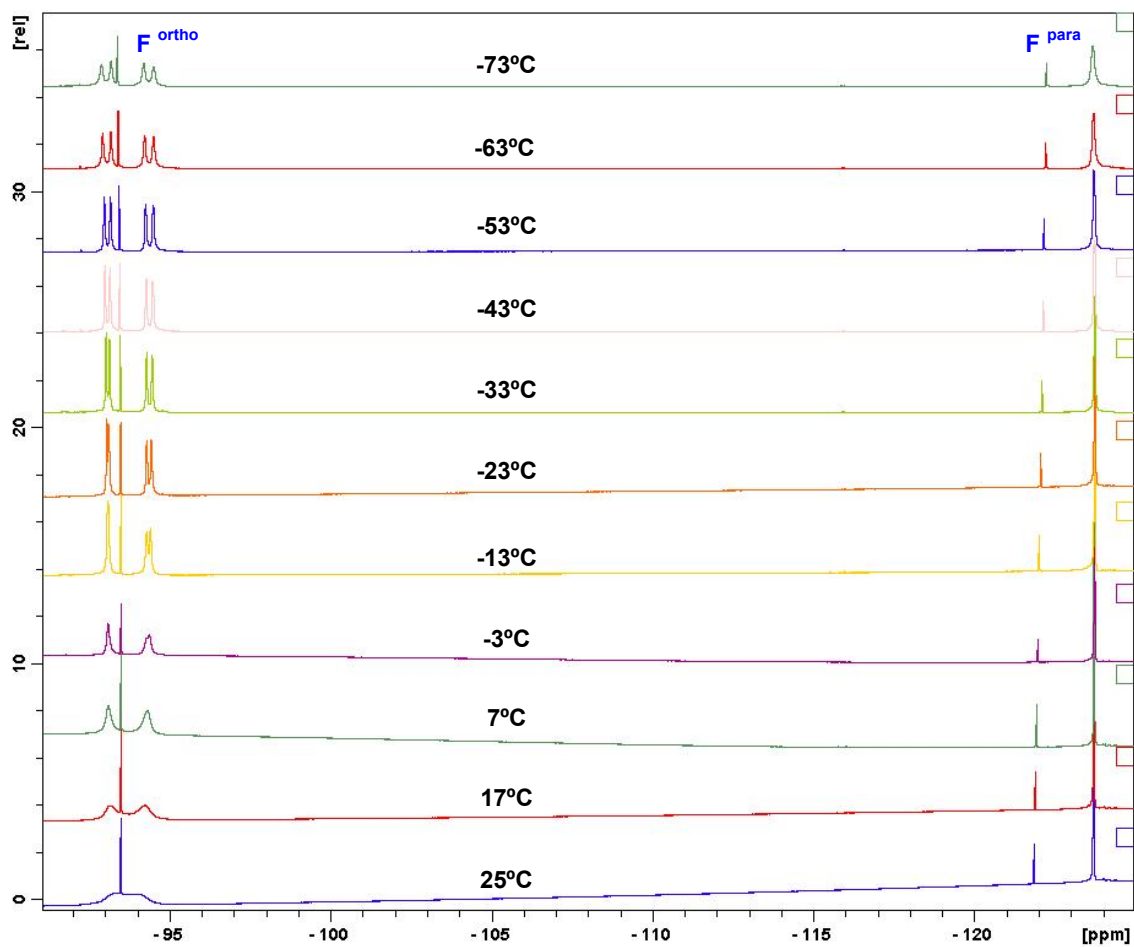

**Figure S10.** Variable Temperature  $^{19}\text{F}$ -NMR of the 5@3 inclusion complex in  $\text{THF-}d_8$ .

## <sup>1</sup>H NMR Titration Experiments

<sup>1</sup>H NMR spectroscopic titration experiments for the binding of **5** with **3** were carried out on a Bruker Avance 500 Ultrashielded spectrometer at room temperature in THF-*d*<sub>8</sub>. In order to maintain the concentration of the host constant along the titration, the experiments were performed adding aliquots of a guest **5** solution ( $6.68 \times 10^{-3}$  M), containing host **3** ( $1.33 \times 10^{-3}$  M), to a host **3** solution ( $1.33 \times 10^{-3}$  M). 20  $\mu$ L of the guest solution were added to the NMR tube containing the host solution (initial volume = 0.6 mL) and the spectra were recorded after each addition.

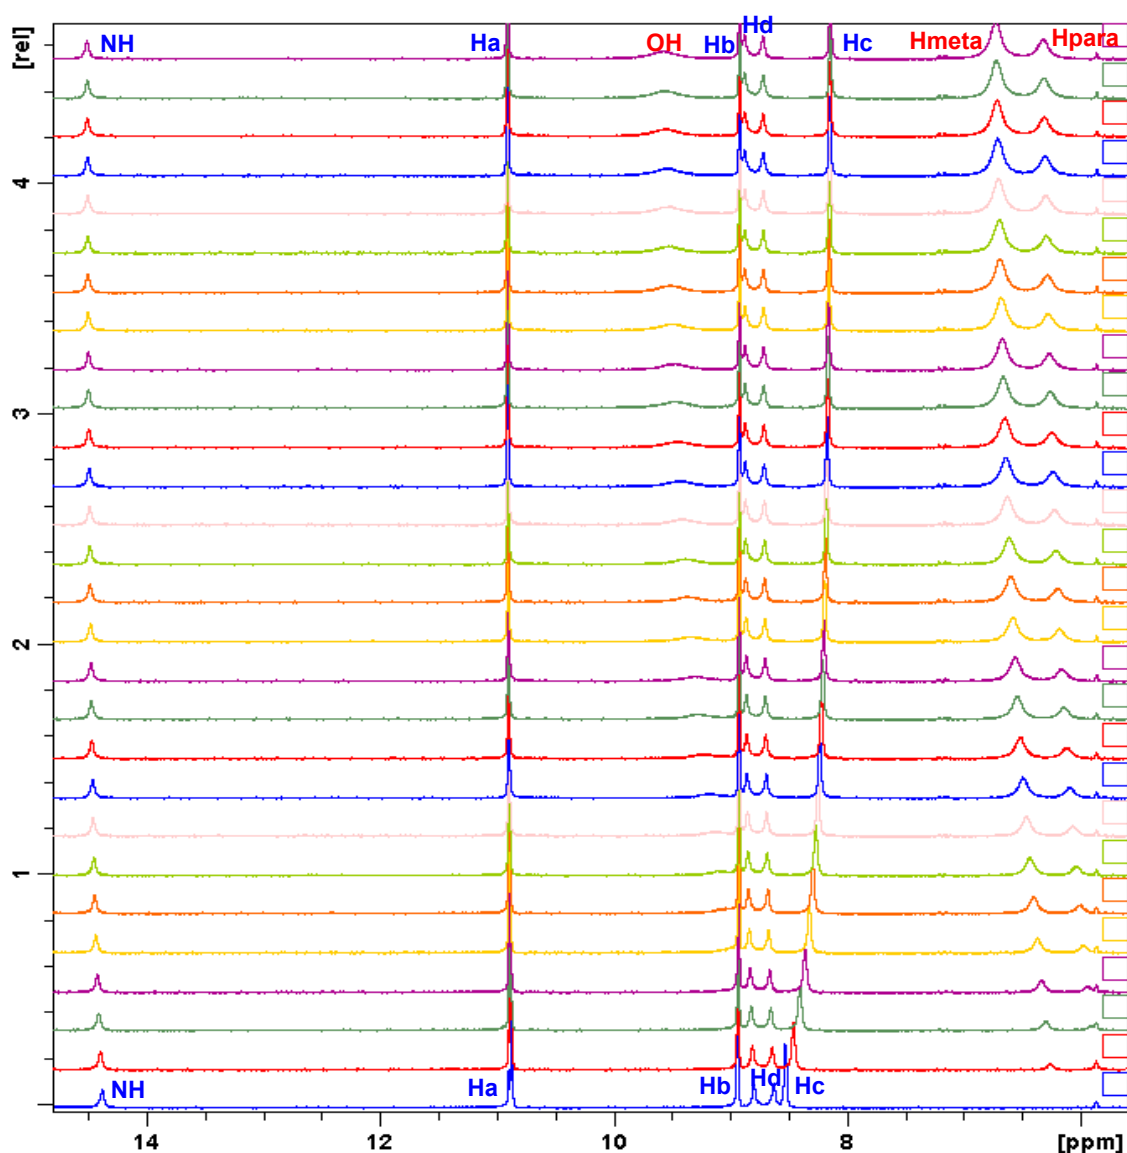

**Figure S11.** <sup>1</sup>H-NMR titration of the **5@3** inclusion complex in THF-*d*<sub>8</sub>. Host signals in blue, guest signals in red.

Host NH and Hc protons and guest Hmeta and Hpara protons were monitored. Titration data were analyzed using HypNMR 2006 software with a 1:1 host/guest model giving a binding constant of  $2.32 \times 10^3$  for the **5@3** inclusion complex.

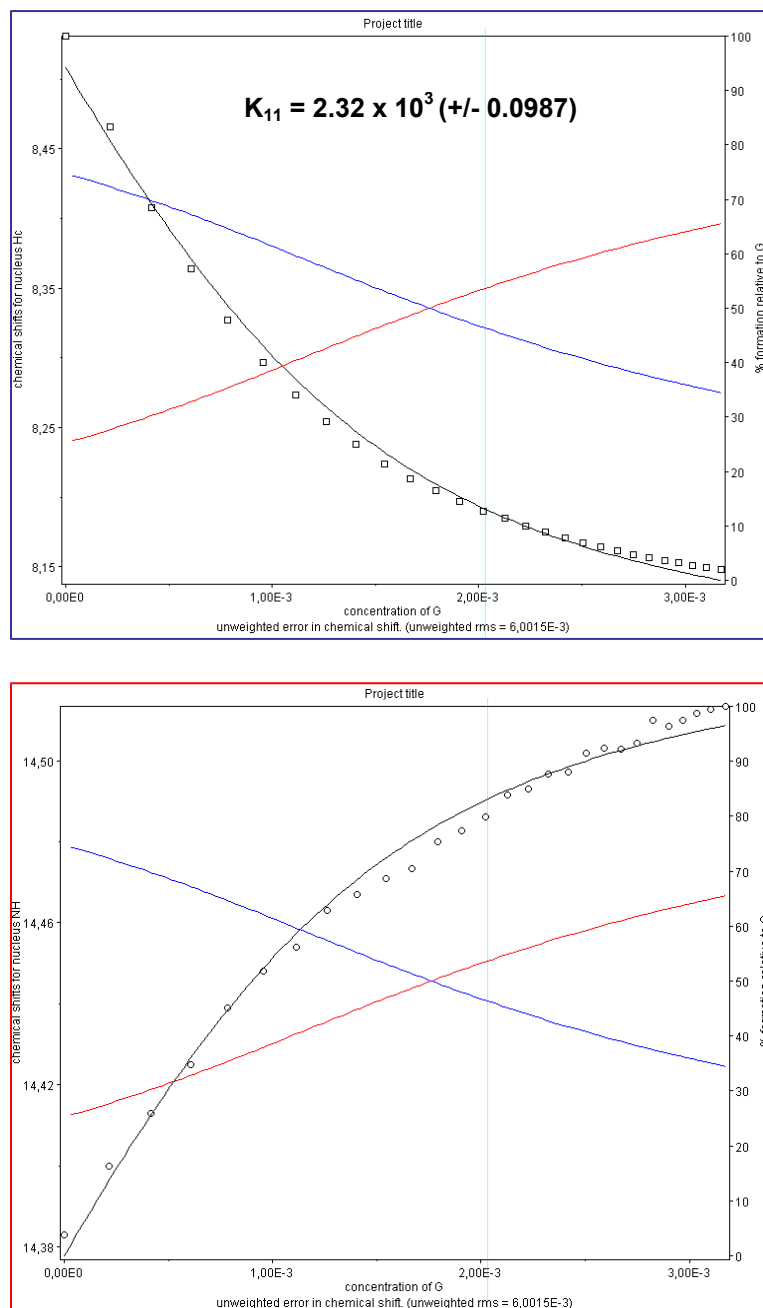

**Figure S12.** Isotherm fitting for Hc (top) and NH (bottom) protons and binding constant of **5@3** inclusion complex calculated by HypNMR 2006 software.

**References:**

- [1] E. Botana, E. Da Silva, P. Ballester, J. Benet-Buchholz, J. de Mendoza, *Angew. Chem. Int. Ed.* 2007, **46**, 198.
- [2] P. Espinet , J. M. Martínez-Ilarduya, C. Pérez-Briso, A. L. Casado, M. A. Alonso, *J. Organomet. Chem.* 1998, **551**, 9.
- [3] J. Pérez, J. L. Serrano, J. M. Galiana, F. L. Cumbreira, A. L. Ortiz, G. Sánchez and J. García *Acta Crystallographica Section B* 2007, **63**, 75.
- [4] P. Fortazzi, G. Groppi *Catalysis Today* 1999, **54**, 165.
